# Supplementary material
Source: Research Square preprint supplement (doi:10.21203/rs.3.rs-9888982/v1)
Supplement: Supplementary file 1 [file c7ed14ca64c06c9813561955.docx]

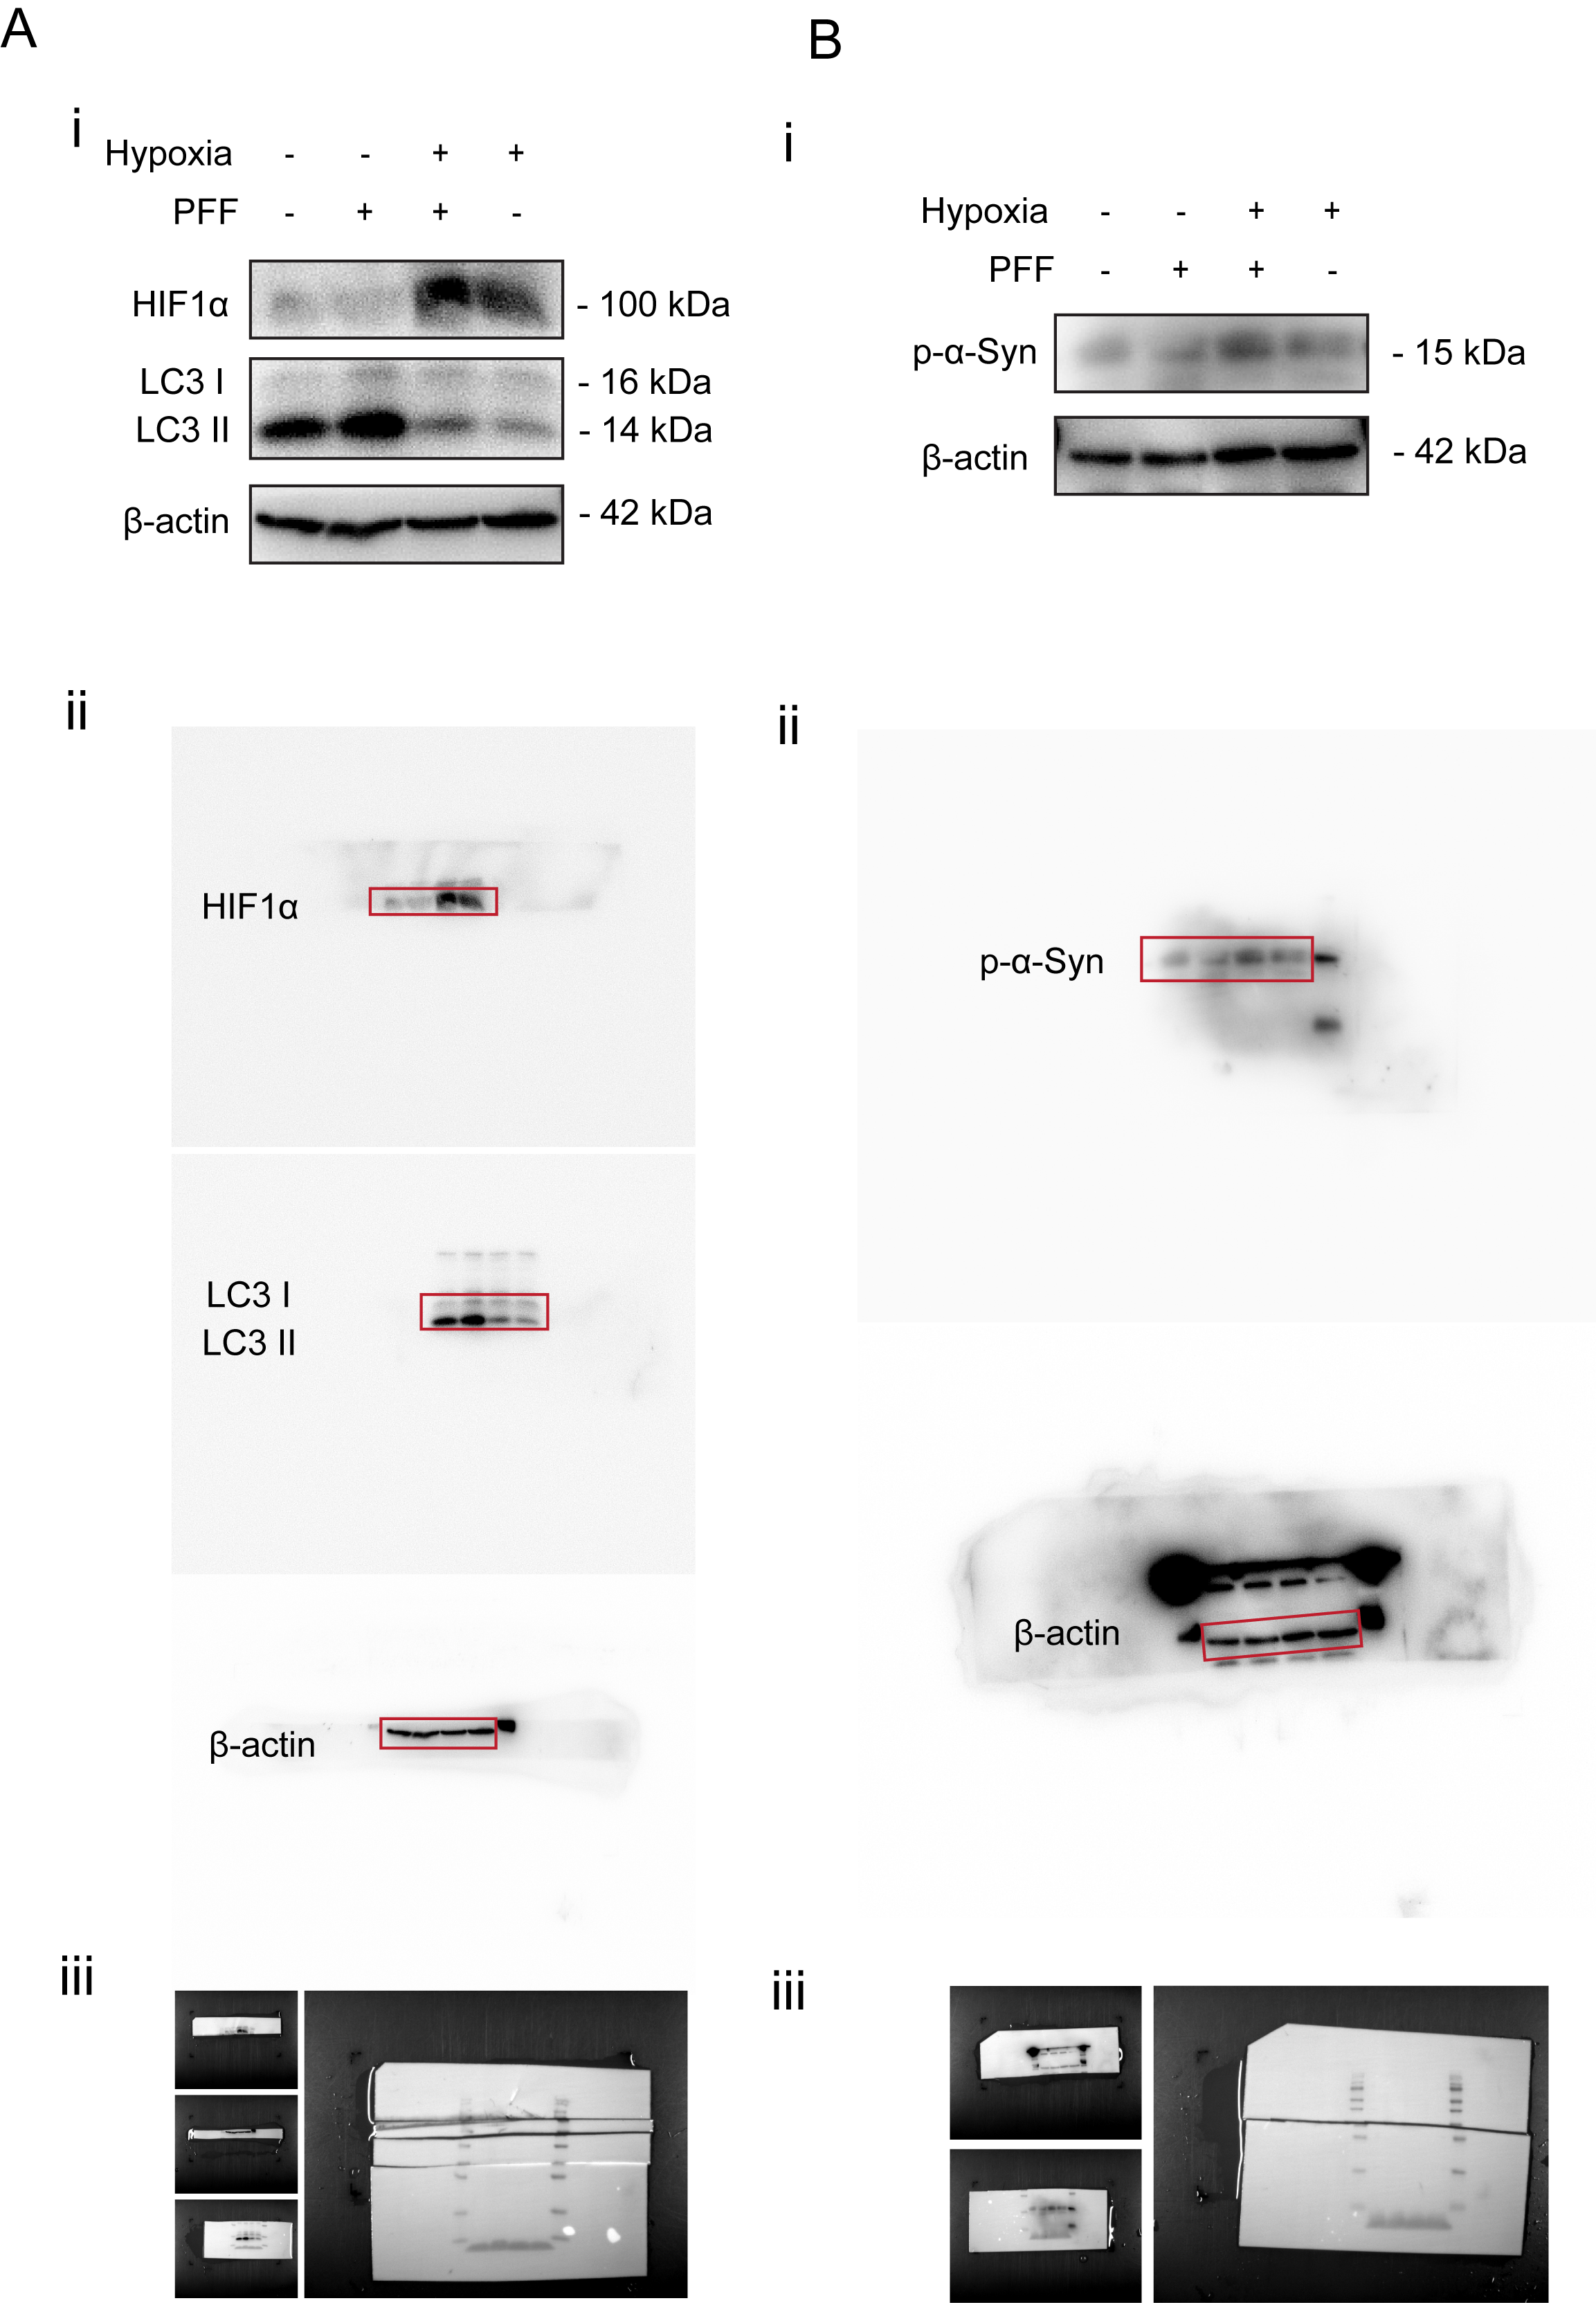


**Supplementary Figure S1. Original, uncropped Western blot images corresponding to Figure 7 in the main text.**

(A) Raw data images corresponding to the representative blots for HIF1α, LC3, and β-actin shown in Figure 7B. (B) Raw data images corresponding to the representative blots for p-α-Syn and β-actin shown in Figure 7C. For both panels A and B, the images are organized from top to bottom as follows: (i) The representative cropped images as they appear in the main manuscript. (ii) The full, uncropped chemiluminescence exposure images. The red rectangles indicate the specific cropped regions displayed in panel (i). (iii) The corresponding bright-field images of the cut PVDF membranes (left) and the reconstructed whole membranes (right), demonstrating the exact cutting positions and the relative locations of the pre-stained molecular weight markers.
